# Supplementary material for: Unlocking efficiency: experimental and theoretical insights into biomass-derived carbon nanofluids with enhanced thermal conductivity
Source: Royal Society of Chemistry journal article supplement (doi:10.1039/d4nr04740k), 2025-01-01
Supplement: d4nr04740k1.pdf [file d4nr04740k1.pdf]

## Unlocking Efficiency: Experimental and Theoretical Insights into Biomass-Derived Carbon Nanofluids with Enhanced Thermal Conductivity

Kiran Bijapur et al.

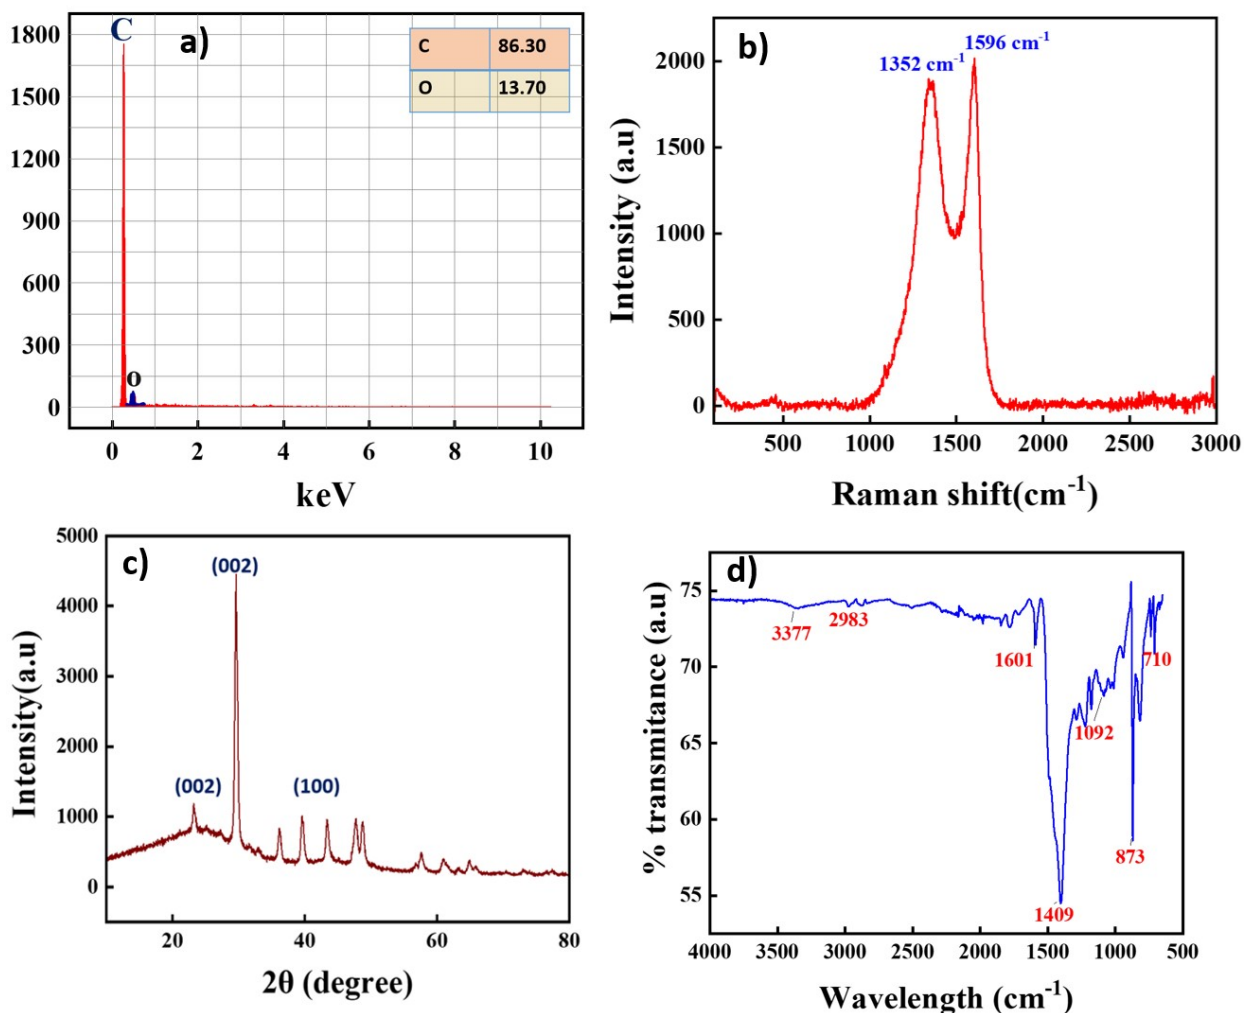

**Fig. S1** Characterization of AS900 a) EDS spectra, b) Raman Spectrum, c) XRD d) FTIR analysis.
